# Supplementary material for: Znhit1 controls intestinal stem cell maintenance by regulating H2A.Z incorporation
Source: PubMed Central journal article supplement (PMC6403214; doi:10.1038/s41467-019-09060-w), 2019-03-06
Supplement: 41467_2019_9060_MOESM1_ESM.pdf [file 41467_2019_9060_MOESM1_ESM.pdf]

## **Supplementary Information**

# **Znhit1 controls intestinal stem cell maintenance by regulating H2A.Z incorporation**

**Zhao et al.**

**Supplementary Figure 1-12**

**Supplementary Table 1-3**

## Supplementary Figure 1

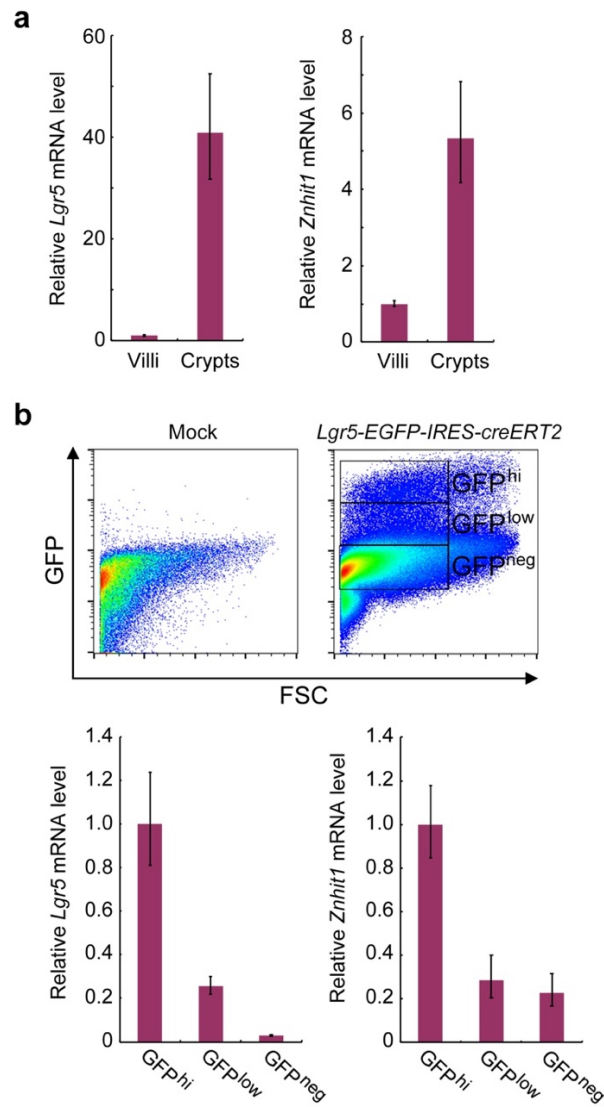

**Supplementary Figure 1 | Expression pattern of *Znhit1* in intestinal epithelium.** (a) Intestinal villi and crypts were mechanically isolated from 8-week-old C57BL/6 mice then subjected to qRT-PCR to examine the expression of *Lgr5* and *Znhit1*. (b) The crypts harvested from 8-week-old *Lgr5-EGFP-IRES-creERT2* mice were dissociated into single cells then subjected to FACS. qRT-PCR was employed to examine the expression of *Lgr5* and *Znhit1* in *Lgr5*<sup>+</sup> ISCs (GFP<sup>hi</sup>), daughter progenitor cells (GFP<sup>low</sup>) and other crypt cells (GFP<sup>neg</sup>). Histone H3 was used as an internal control. The statistical data represent mean±s.d. (n=3 mice).

## Supplementary Figure 2

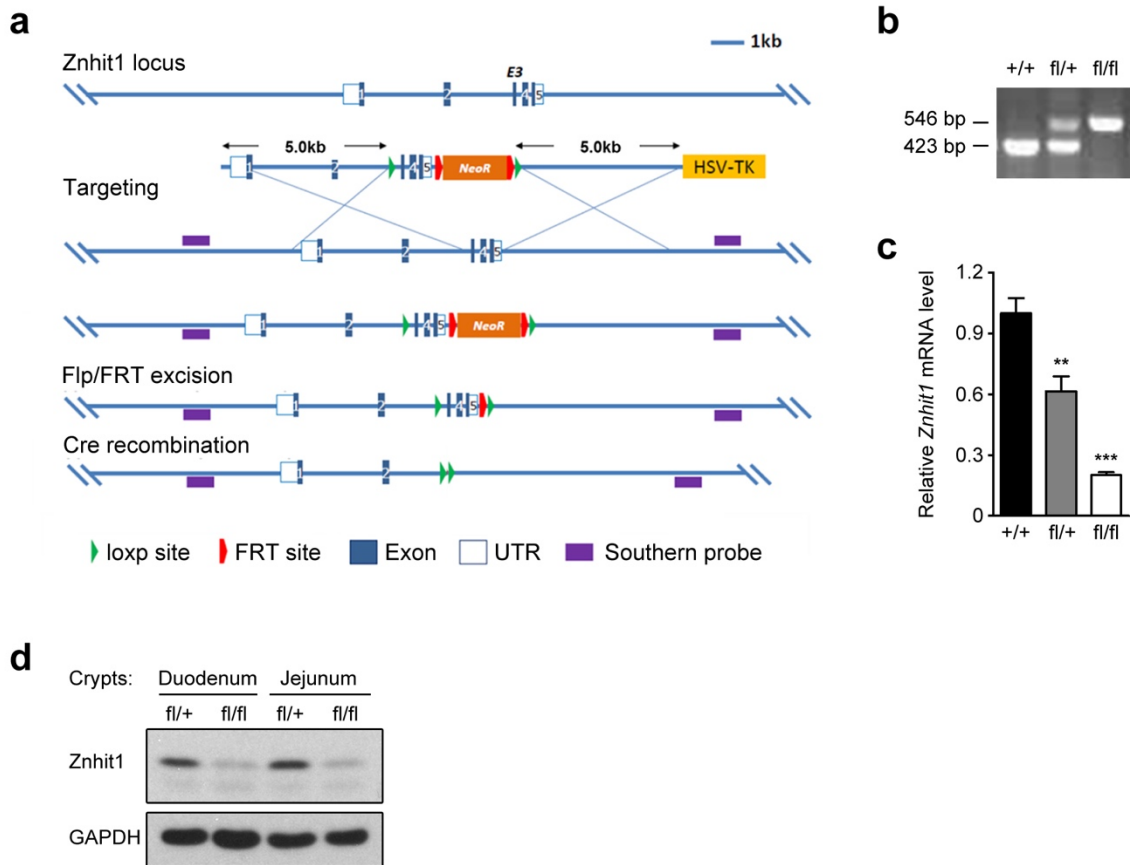

**Supplementary Figure 2 | Tissue-specific *Znhit1* deletion in intestinal epithelium.** (a) Targeting strategy of *Znhit1*<sup>fl/fl</sup> mice (b) Genotyping of *Villin cre* (+/+), *Znhit1*<sup>fl/+</sup>; *Villin-cre* (fl/+) and *Znhit1*<sup>fl/fl</sup>; *Villin-cre* (fl/fl) mice. 423bp: wildtype allele. 546bp: floxed allele. (c) Intestine were harvested from *Villin cre* (+/+), *Znhit1*<sup>fl/+</sup>; *Villin-cre* (fl/+) and *Znhit1*<sup>fl/fl</sup>; *Villin-cre* (fl/fl) mice at P0 to examine *Znhit1* expression using qRT-PCR. Histone H3 was used as an internal control. The statistical data represent mean±s.d. (n=3 mice per genotype). Student's *t*-test: \*\*\* indicates P<0.001. \*\* indicates P<0.01. (d) Intestinal crypts were isolated from *Znhit1*<sup>fl/+</sup>; *Villin-cre* (fl/+) and *Znhit1*<sup>fl/fl</sup>; *Villin-cre* (fl/fl) mice at P9 for immunoblotting with the indicated antibodies. GAPDH served as a loading control.

### Supplementary Figure 3

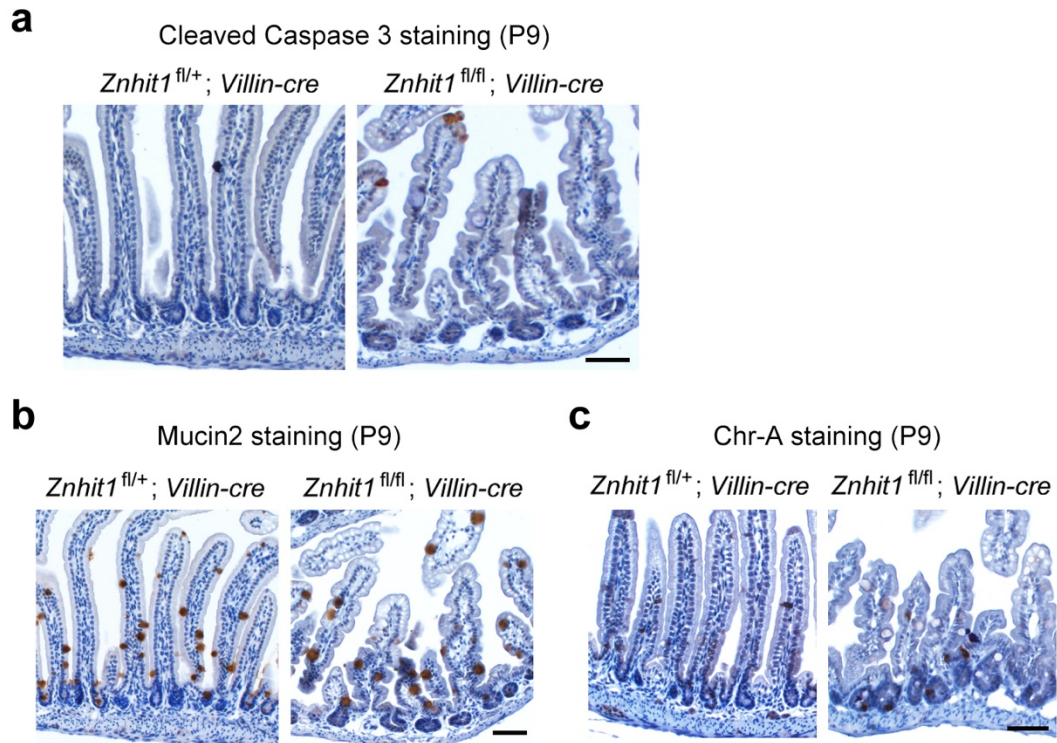

**Supplementary Figure 3 | *Znhit1* deletion in intestinal epithelium has no effect on crypt cell death or villus cell terminal differentiation.** Cleaved Caspase 3, Mucin2 and Chr-A staining of intestinal sections from *Znhit1<sup>fl/+</sup>; Villin-cre* and *Znhit1<sup>fl/fl</sup>; Villin-cre* mice at P9. Scale bar, 50  $\mu$ m.

## Supplementary Figure 4

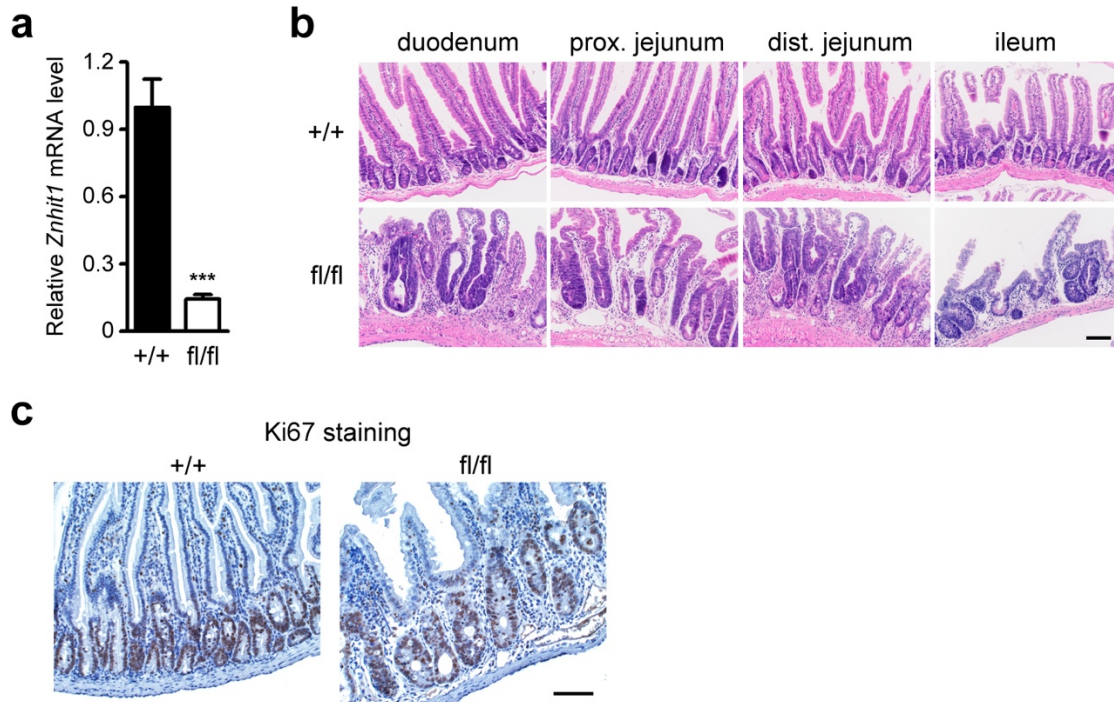

**Supplementary Figure 4 | Inducible knockout of *Znhit1* in intestinal epithelium.** (a) Eight-week-old *Villin-creERT* (+/+) and *Znhit1<sup>fl/fl</sup>; Villin-creERT* (fl/fl) mice were daily injected with tamoxifen for 4 days followed by 7-day waiting period. Intestinal crypts were harvested for qRT-PCR to examine *Znhit1* expression. Histone H3 was used as an internal control. The statistical data represent mean±s.d. (n=3 mice per genotype). Student's *t*-test: \*\*\* indicates  $P < 0.001$ . (b) Paraffin embedded intestine tissues of *Villin-creERT* (+/+) and *Znhit1<sup>fl/fl</sup>; Villin-creERT* (fl/fl) mice following tamoxifen treatment were stained with haematoxylin and eosin. Scale bar, 100  $\mu\text{m}$ . (c) Ki67 staining of intestinal sections from *Villin-creERT* (+/+) and *Znhit1<sup>fl/fl</sup>; Villin-creERT* (fl/fl) mice following tamoxifen treatment. Scale bar, 50  $\mu\text{m}$ . A representative result of three independent experiments was shown.

## Supplementary Figure 5

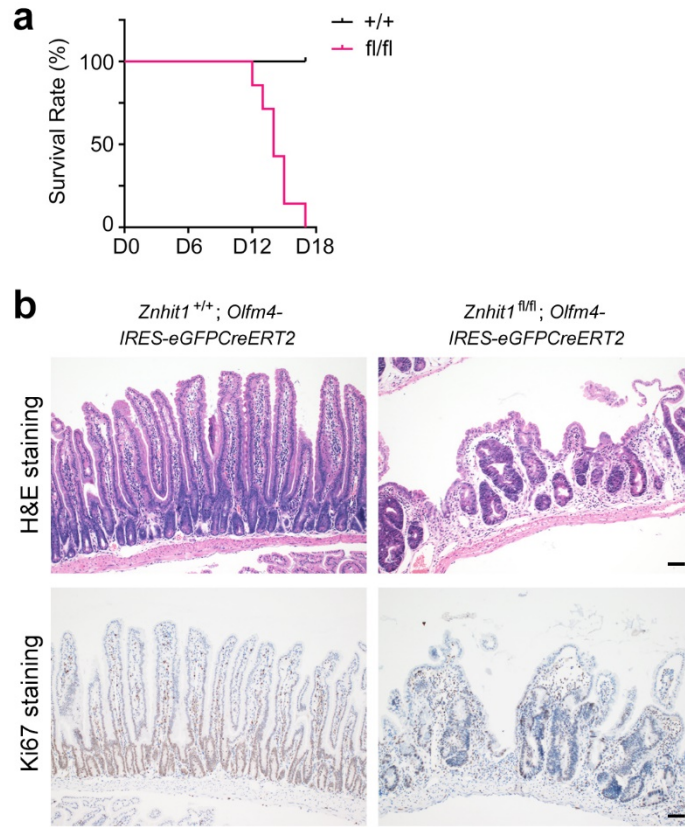

**Supplementary Figure 5 | Inducible knockout of *Znhit1* Lgr5+ ISCs.** Eight-week-old *Znhit1*<sup>+/+</sup>; *Olfm4*-IRES-eGFP*CreERT2* (+/+) and *Znhit1*<sup>fl/fl</sup>; *Olfm4*-IRES-eGFP*CreERT2* (fl/fl) mice were daily injected with tamoxifen for 4 days. (a) Kaplan–Meier survival curves following tamoxifen administration (n=7 mice per genotype). (b) Embedded intestine tissues (D14-16) were subjected to H&E and Ki67 staining. A representative result of three independent experiments was shown. Scale bar, 100  $\mu$ m.

## Supplementary Figure 6

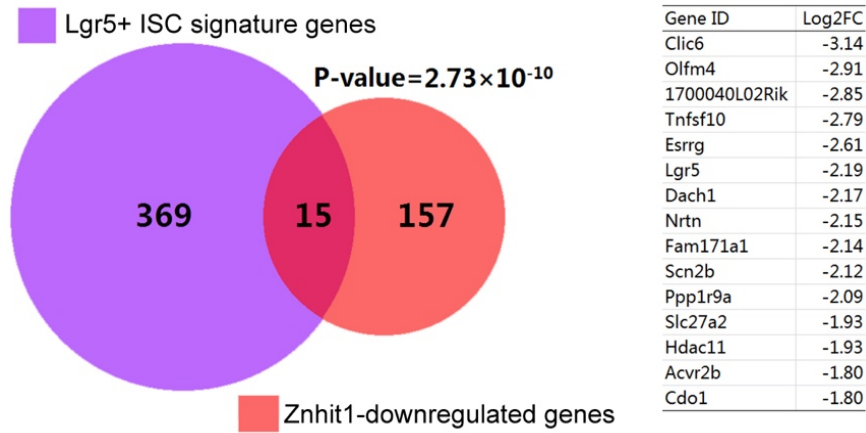

**Supplementary Figure 6 | Znhit1 deletion induces a significant downregulation of 15 Lgr5+ ISC signature genes.** Venn diagram showing the overlap between Lgr5+ ISC signature genes TSS and Znhit1-downregulated genes. The significance was evaluated by fisher's exact test.



## Supplementary Figure 7

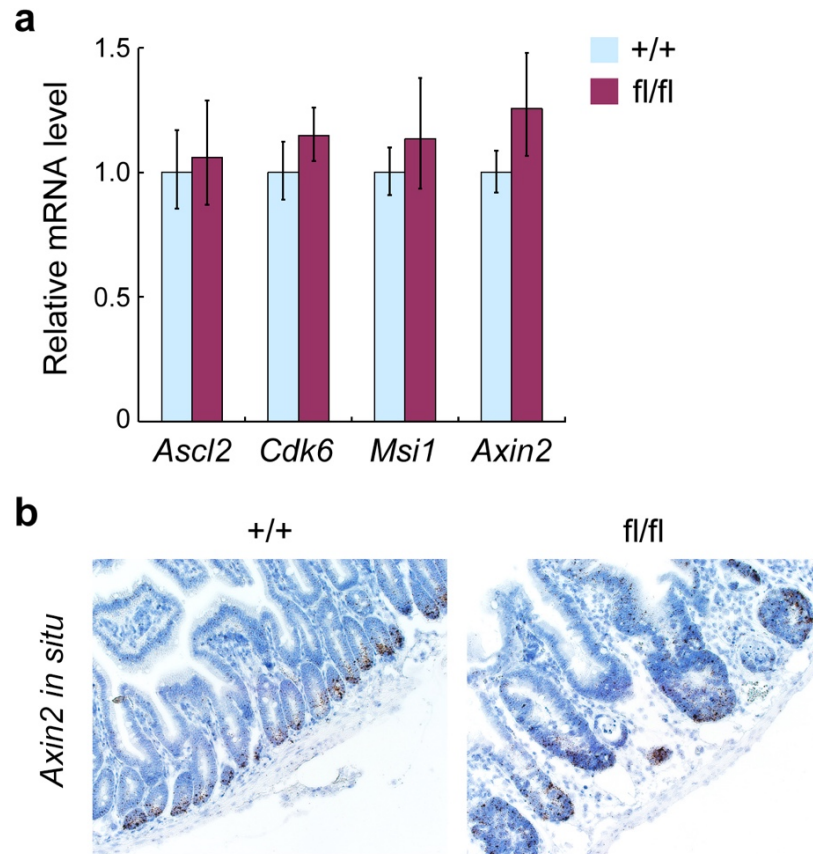

**Supplementary Figure 7 | *Znhit1* deficiency has no obvious effect on the expression of *Ascl2*, *Cdk6*, *Msi1* or *Axin2*.** (a) Eight-week-old *Villin-creERT* (+/+) and *Znhit1<sup>fl/fl</sup>; Villin-creERT* (fl/fl) mice were daily injected with tamoxifen for 4 days followed by 7-day waiting period. Intestinal crypts were harvested for qRT-PCR to examine the expression of indicated genes. Histone H3 was used as an internal control. The statistical data represent mean±s.d. (n=3 mice per genotype). (b) *Axin2 in situ* was performed in intestinal sections from *Villin-creERT* (+/+) and *Znhit1<sup>fl/fl</sup>; Villin-creERT* (fl/fl) mice following tamoxifen treatment. A representative result of three independent experiments was shown.



## Supplementary Figure 8

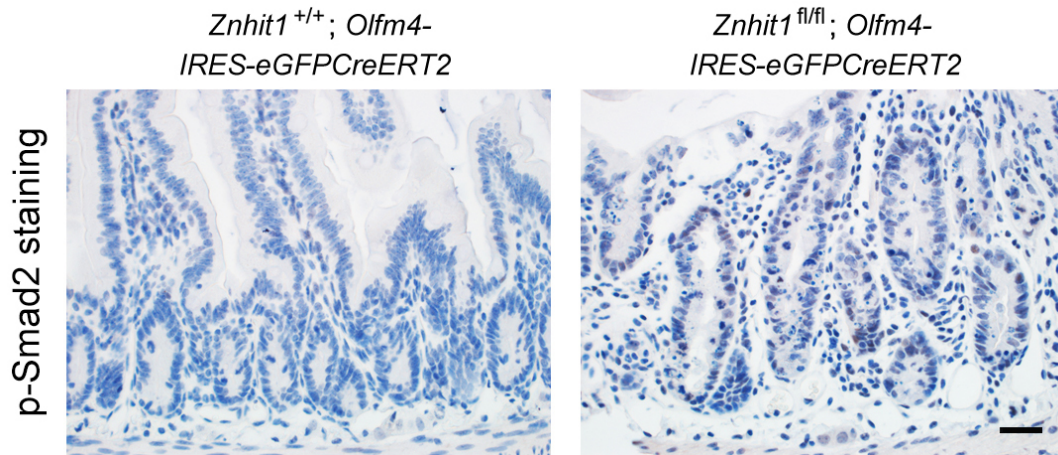

**Supplementary Figure 8 | *Lgr5*<sup>+</sup> ISC specific *Znhit1* deletion leads to TGF- $\beta$  activation in crypts.** *Znhit1<sup>+/+</sup>; Olfm4-IRES-eGFPCreERT2* and *Znhit1<sup>fl/fl</sup>; Olfm4-IRES-eGFPCreERT2* mice were daily injected with tamoxifen for 4 days followed by 7-day waiting period. Then, embedded intestine tissues were subjected to phospho-Smad2 staining. A representative result of three independent experiments was shown. Scale bar, 50  $\mu$ m.

## Supplementary Figure 9

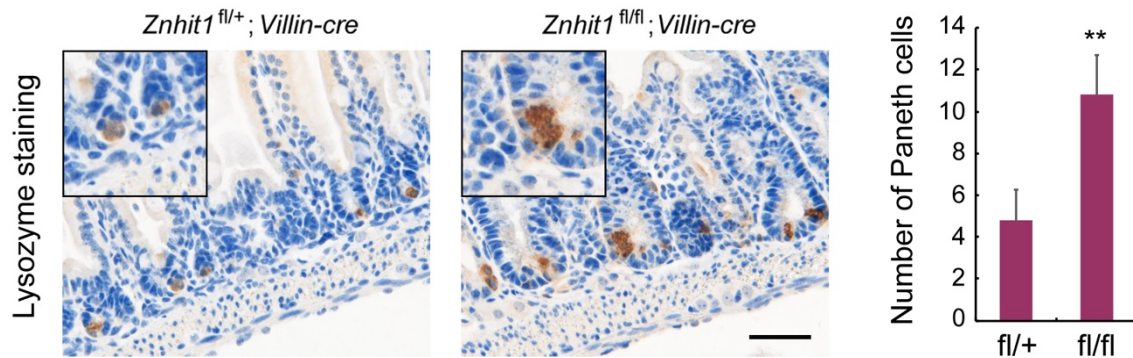

**Supplementary Figure 9 | *Znhit1* deficiency promotes the differentiation of Paneth cells.** Lysozyme staining of intestinal sections from *Znhit1<sup>fl/+</sup>; Villin-cre* and *Znhit1<sup>fl/fl</sup>; Villin-cre* mice at P15. A representative result of three independent experiments was shown. Scale bar, 100  $\mu$ m. The Lysozyme+ cells were quantified, and the data represent mean  $\pm$  s.d. (n=3 mice per genotype). Student's *t*-test: \*\* indicates  $P < 0.01$ .

## Supplementary Figure 10

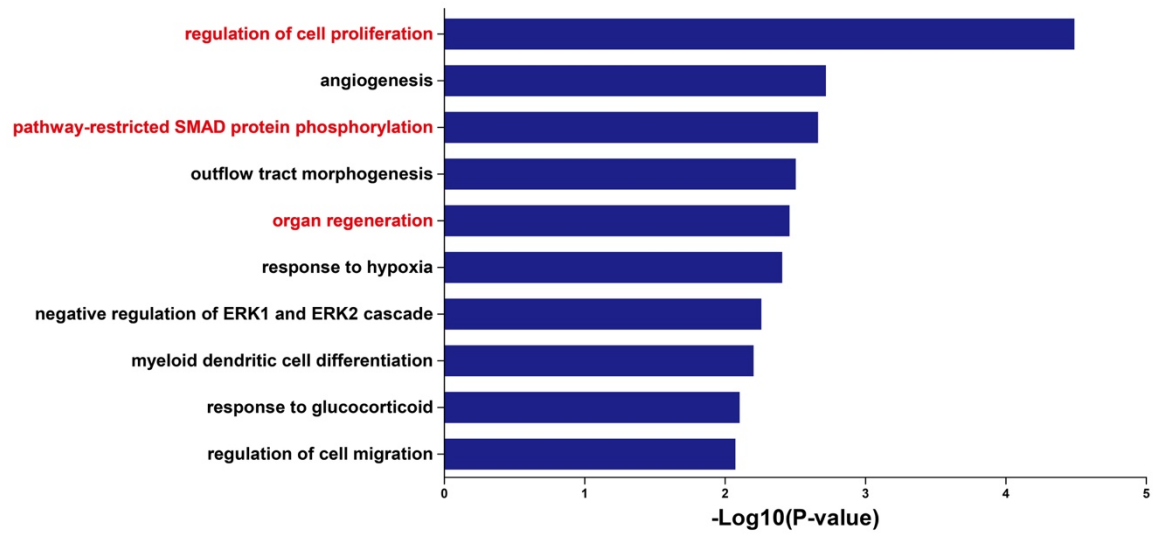

**Supplementary Figure 10 | GO biological function enrichment analysis of 107 Znhit1-regulated genes with TSS H2A.Z binding.**

## Supplementary Figure 11

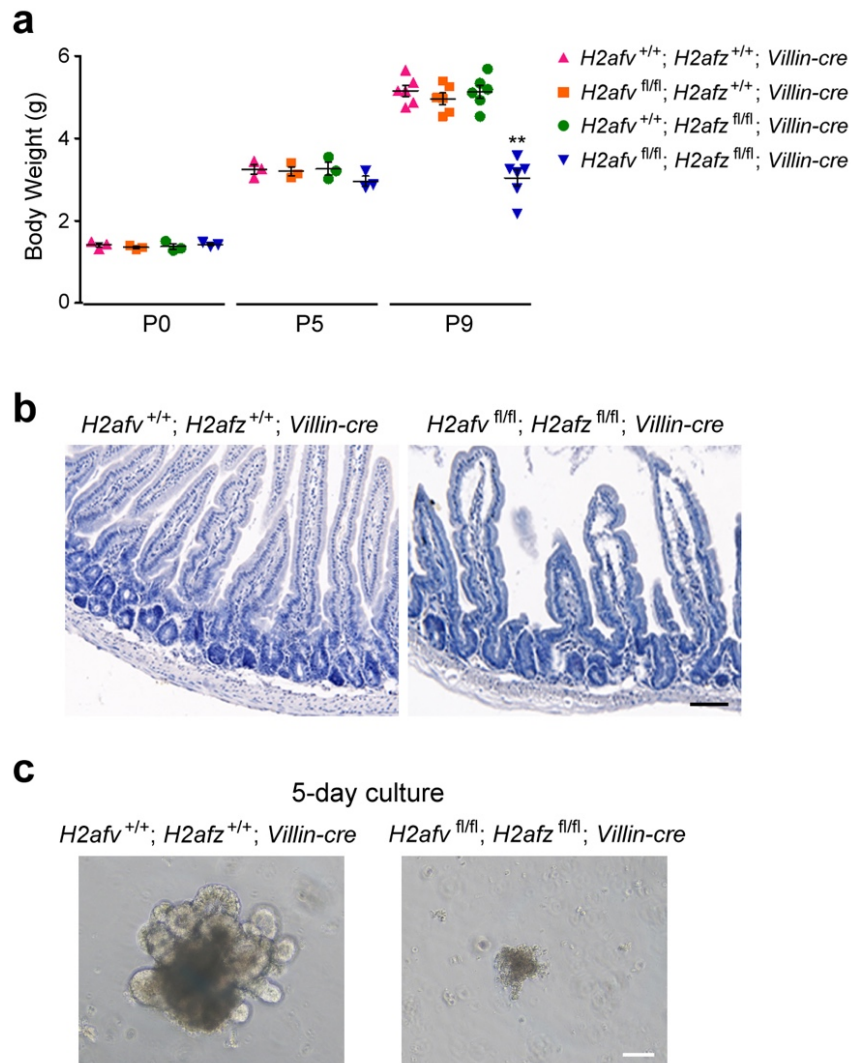

**Supplementary Figure 11 | H2A.Z deletion mimics *Znhit1*-deficient phenotype.** (a) Body weights of  $H2afv^{+/+}; H2afz^{+/+}; Villin-cre$ ,  $H2afv^{fl/fl}; H2afz^{+/+}; Villin-cre$ ,  $H2afv^{+/+}; H2afz^{fl/fl}; Villin-cre$  and  $H2afv^{fl/fl}; H2afz^{fl/fl}; Villin-cre$  mice at indicated time. The data represent mean±s.d. (n=5 mice per group). Kruskal-Wallis' H test: \*\* indicates  $P < 0.01$ . (b) Intestine sections of  $H2afv^{+/+}; H2afz^{+/+}; Villin-cre$  and  $H2afv^{fl/fl}; H2afz^{fl/fl}; Villin-cre$  mice. A representative result of three independent experiments was shown. Scale bar, 100  $\mu\text{m}$ . (c) Intestinal crypts were isolated from  $H2afv^{+/+}; H2afz^{+/+}; Villin-cre$  and  $H2afv^{fl/fl}; H2afz^{fl/fl}; Villin-cre$  mice at P9, embedded in Matrigel (100 crypts per well) and cultured for 5 days. Scale bar, 50  $\mu\text{m}$ .

## Supplementary Figure 12

Fig. 2f

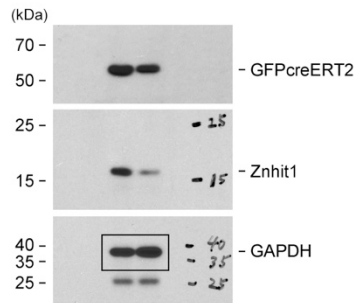

Fig. 5a

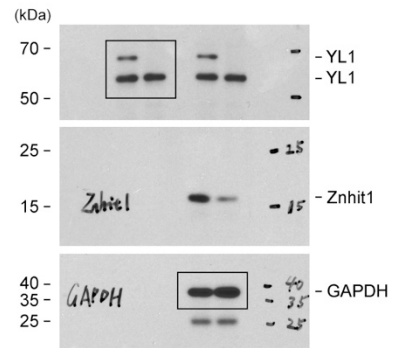

Fig. 5b

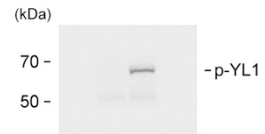

Fig. 5c

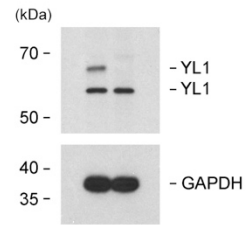

Fig. 5d

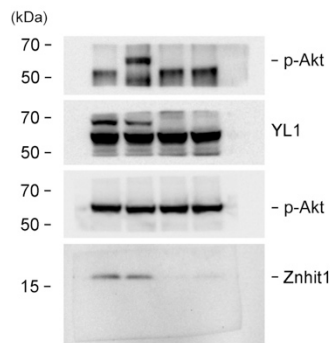

Fig. 5e

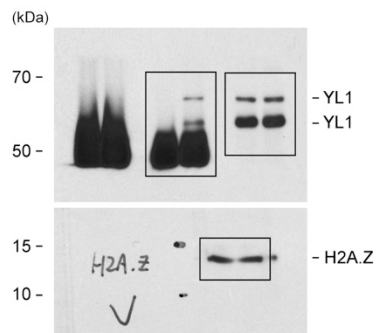

Fig. 5f

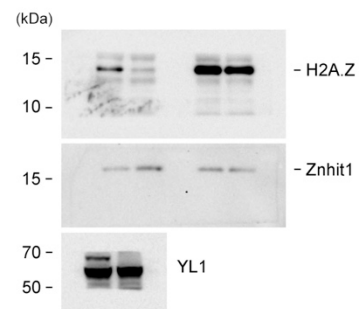

Fig. 5g

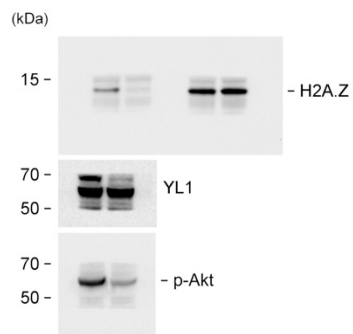

Fig. 5h

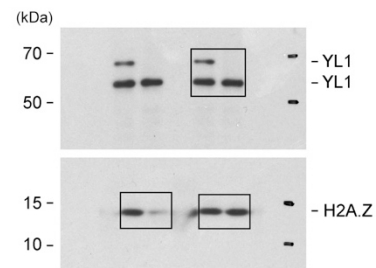

## Supplementary Figure 12 | Full immunoblots.

**Supplementary Table 1 | 107 genes Znhit1-regulated genes with TSS H2A.Z binding.**

| Gene ID          | log2FoldChange | P-value   |
|------------------|----------------|-----------|
| <i>Ctsl</i>      | 3.45           | 8.68E-144 |
| <i>Areg</i>      | 3.15           | 6.18E-137 |
| <i>Pdlim7</i>    | 3.62           | 4.91E-125 |
| <i>Cyp4v3</i>    | -2.69          | 4.43E-118 |
| <i>Hmox1</i>     | 4.28           | 3.25E-103 |
| <i>Cbr3</i>      | 4.76           | 8.99E-103 |
| <i>Tgfb2</i>     | 2.26           | 2.15E-85  |
| <i>Psat1</i>     | 2.26           | 7.71E-85  |
| <i>Ppl</i>       | 2.39           | 1.09E-77  |
| <i>Emp2</i>      | 2.75           | 3.34E-77  |
| <i>Abcb1b</i>    | 3.32           | 2.81E-73  |
| <i>Crip2</i>     | 3.58           | 2.40E-62  |
| <i>Adm2</i>      | 5.43           | 1.64E-61  |
| <i>Plbd1</i>     | -2.10          | 3.09E-60  |
| <i>Dusp3</i>     | 2.57           | 6.60E-58  |
| <i>Avpi1</i>     | 2.34           | 2.78E-56  |
| <i>Rab11fip5</i> | 3.82           | 2.01E-55  |
| <i>Spry4</i>     | 3.19           | 4.85E-54  |
| <i>Htra1</i>     | 3.65           | 5.29E-54  |
| <i>Smim1</i>     | 3.81           | 2.12E-53  |
| <i>Dpysl3</i>    | 3.15           | 8.44E-52  |
| <i>Ptrf</i>      | 3.38           | 3.06E-51  |
| <i>Trib3</i>     | 2.73           | 3.72E-51  |
| <i>Plau</i>      | 4.32           | 3.56E-50  |
| <i>Gcnt1</i>     | 3.01           | 1.19E-49  |
| <i>Pcca</i>      | -2.11          | 4.22E-49  |
| <i>Arg2</i>      | -2.18          | 4.93E-49  |
| <i>Lamc3</i>     | 3.40           | 2.92E-48  |
| <i>Svip</i>      | -2.31          | 4.92E-48  |
| <i>Ereg</i>      | 2.57           | 1.60E-47  |
| <i>Tubb2a</i>    | 1.81           | 2.19E-44  |
| <i>Car4</i>      | -1.80          | 2.30E-43  |
| <i>Pmm1</i>      | 1.89           | 2.42E-43  |
| <i>Gabarapl1</i> | 1.88           | 6.55E-43  |
| <i>Hkl</i>       | 2.34           | 8.53E-43  |
| <i>Scrn2</i>     | -1.77          | 1.59E-40  |

|                      |       |          |
|----------------------|-------|----------|
| <i>Fam129a</i>       | 2.38  | 4.06E-39 |
| <i>Fbp1</i>          | -1.95 | 1.42E-38 |
| <i>Ephx1</i>         | 2.50  | 2.58E-38 |
| <i>Pik3r3</i>        | 1.86  | 1.47E-37 |
| <i>Tnfrsf12a</i>     | 3.03  | 9.52E-37 |
| <i>Itgb3</i>         | 3.20  | 2.27E-36 |
| <i>Trf</i>           | 3.17  | 4.66E-36 |
| <i>Icam1</i>         | 2.59  | 2.25E-32 |
| <i>Fam20a</i>        | -1.70 | 2.32E-32 |
| <i>Rab19</i>         | -1.98 | 2.39E-31 |
| <i>Plxnd1</i>        | 2.01  | 9.85E-31 |
| <i>Dusp1</i>         | 1.98  | 4.76E-30 |
| <i>Opn3</i>          | 2.19  | 2.99E-29 |
| <i>Setd4</i>         | 1.87  | 4.92E-29 |
| <i>Dennd5a</i>       | 1.84  | 2.02E-28 |
| <i>Cadm4</i>         | 2.44  | 2.29E-28 |
| <i>Ltbp2</i>         | 4.16  | 6.30E-28 |
| <i>Gpr157</i>        | -1.81 | 7.95E-28 |
| <i>Rgcc</i>          | 1.98  | 8.93E-28 |
| <i>Fzd1</i>          | 2.85  | 1.99E-27 |
| <i>AI427809</i>      | -2.70 | 1.97E-26 |
| <i>Chac1</i>         | 2.43  | 2.14E-26 |
| <i>Plk2</i>          | 4.42  | 3.96E-26 |
| <i>Nkain4</i>        | 3.43  | 8.42E-25 |
| <i>Ffar4</i>         | 1.97  | 2.49E-24 |
| <i>Smtnl2</i>        | 3.01  | 2.86E-24 |
| <i>Mdfr</i>          | 5.31  | 2.97E-24 |
| <i>Gpsm1</i>         | 1.96  | 5.56E-24 |
| <i>Vwce</i>          | -2.33 | 1.10E-23 |
| <i>Tgfb3</i>         | 2.97  | 1.16E-23 |
| <i>Emc9</i>          | -1.88 | 3.78E-22 |
| <i>Slc35e4</i>       | 2.81  | 1.58E-20 |
| <i>Timp3</i>         | 3.24  | 2.61E-20 |
| <i>Macrod1</i>       | -1.81 | 4.81E-20 |
| <i>Npr1</i>          | 2.91  | 6.33E-20 |
| <i>Klf2</i>          | 2.45  | 6.81E-20 |
| <i>Slc27a2</i>       | -1.93 | 6.43E-19 |
| <i>Cdkn1c</i>        | 1.86  | 3.65E-18 |
| <i>S100a14</i>       | 1.97  | 7.49E-18 |
| <i>Arhgef37</i>      | 2.73  | 1.63E-17 |
| <i>8430419L09Rik</i> | -2.49 | 6.02E-15 |



|                      |       |          |
|----------------------|-------|----------|
| <i>Fa2h</i>          | 4.23  | 8.63E-15 |
| <i>Tcea3</i>         | -2.50 | 3.34E-14 |
| <i>Etv4</i>          | 2.33  | 3.56E-14 |
| <i>Cxcl2</i>         | 5.48  | 3.60E-14 |
| <i>Tnfsf9</i>        | 2.60  | 1.54E-13 |
| <i>Pyroxd2</i>       | -1.96 | 3.78E-12 |
| <i>Trp53inp1</i>     | 2.09  | 3.86E-12 |
| <i>Btg3</i>          | 1.88  | 8.63E-12 |
| <i>Plcd3</i>         | 3.28  | 2.19E-11 |
| <i>Herc6</i>         | -1.86 | 9.06E-11 |
| <i>Ajuba</i>         | 2.96  | 1.32E-10 |
| <i>Tnfaip8l3</i>     | -1.81 | 1.34E-10 |
| <i>Mal</i>           | 3.94  | 1.37E-10 |
| <i>Stk32c</i>        | 2.24  | 1.47E-10 |
| <i>Cercam</i>        | 2.77  | 1.20E-09 |
| <i>Tgfb1</i>         | 1.75  | 1.23E-09 |
| <i>Cxcl1</i>         | 4.13  | 1.70E-09 |
| <i>Esrrg</i>         | -2.61 | 2.57E-09 |
| <i>Gsap</i>          | 2.97  | 7.83E-09 |
| <i>Ppp1r9a</i>       | -2.09 | 2.78E-08 |
| <i>Rasl11a</i>       | 1.74  | 3.00E-08 |
| <i>Cxcl5</i>         | 4.39  | 6.78E-08 |
| <i>Lyplal1</i>       | -1.79 | 1.60E-06 |
| <i>Sh3bp5</i>        | 1.84  | 2.03E-05 |
| <i>Gng11</i>         | -1.72 | 2.22E-05 |
| <i>Ifit2</i>         | -1.93 | 3.57E-05 |
| <i>1700003E16Rik</i> | -2.73 | 3.57E-04 |
| <i>Car11</i>         | 3.95  | 5.76E-04 |
| <i>Lgr5</i>          | -2.19 | 1.51E-03 |
| <i>Clic6</i>         | -3.14 | 1.54E-03 |

**Supplementary Table 2 | Primers for RT-qPCR.**

| Quantitative RT-PCR primers | Forward (5'-3')         | Reverse (5'-3')          |
|-----------------------------|-------------------------|--------------------------|
| <i>H3</i>                   | TGTGGCCCTCCGTGAAATC     | GGCATAATTGTTACACGTTTGGC  |
| <i>Znhit1</i>               | TGGGCAAGAGGCTACCTCA     | CAGATGCACTCAGGTTCTGCT    |
| <i>Lgr5</i>                 | CGGGACCTTGAAGATTCCT     | GATTCGGATCAGCCAGCTAC     |
| <i>Ascl2</i>                | TGCCGCACCAGAACTCGTAG    | ACTCCAGACGAGGTGGGCAT     |
| <i>Olfm4</i>                | CAGCCACTTTCCAATTTCACTG  | GCTGGACATACTCCTTCACCTTA  |
| <i>Clic6</i>                | CTCTGGGTTAGACTCTCAGGG   | GGTGCCTCTGTGTCCATGTT     |
| <i>Dach1</i>                | CCTGGGAAACCCGTGTAICTC   | AGATCCACCATTTTGCACCTCATT |
| <i>Esrrg</i>                | AAGATCGACACATTGATTCCAGC | CATGGTTGAACTGTAACCTCCAC  |
| <i>Scn2b</i>                | CGGAGCATGGAAGTCACAG     | CTGCTTGTGGTTCACGGTGTA    |
| <i>Tgfb1</i>                | CTCCCGTGGCTTCTAGTGC     | GCCTTAGTTTGGACAGGATCTG   |
| <i>Tgfb2</i>                | CCGCTGCATATCGTCCTGTG    | AGTGGATGGATGGTCCTATTACA  |
| <i>Pla2g2e</i>              | CCAGTGGACGAGACGGATTG    | AGCAGCTCTCTTGTCCACACTC   |
| <i>Lyz2</i>                 | ATGGAATGGCTGGCTACTATGG  | ACCAGTATCGGCTATTGATCTGA  |
| <i>Hopx</i>                 | AGGAGCAGACGCAGAAATG     | GAAACATCAAAACAGCCTGGG    |
| <i>H2afv</i>                | GCTAAGGCGGTGTCTCGTTC    | TGTGGTGCAGTCTTCAAGTG     |
| <i>H2afz</i>                | CCAAGACAAAGGCGGTTTCC    | TCCTGCCAACTCAAGTACCTC    |
| <i>Cdk6</i>                 | GGCGTACCCACAGAAACCATA   | AGGTAAGGGCCATCTGAAAACCT  |
| <i>Msi1</i>                 | TAAAGTGCTGGCGCAATCG     | TCTTCGTCCGAGTGACCATCT    |
| <i>Axin2</i>                | GCTCCAGAAGATCACAAAGAGC  | AGCTTTGAGCCTTCAGCATC     |

### Supplementary Table 3 | Primers for ChIP-qPCR.

| ChIP-qPCR primers | Forward (5'-3')        | Reverse (5'-3')        |
|-------------------|------------------------|------------------------|
| Negative region   | CCCTCTACAGAACCACC      | TCCTTCATTCCCACATC      |
| <i>Lgr5</i>       | GGTGAAGACGCTGAGGTTGG   | CCTCTACAGGCTCCCTGCTCT  |
| <i>Clic6</i>      | CTCACCTGAGCAGCGTCG     | CTCCTGGTCCCTCGATTGTC   |
| <i>Tgfb2</i>      | CGAGATGGCAAAGCTGAGGA   | CCGAAAGGGAAGTTTAAGAAGT |
| <i>Tgfb1</i>      | GCACTGCGCTGTCTCGCAAGGA | TTTGTGGCTCCCGAGGGCTGGT |
